# Supplementary material for: Soil macrofauna communities in Brazilian land-use systems
Source: PubMed Central journal article supplement (PMC10837794; doi:10.3897/bdj.12.e115000), 2024-01-15
Supplement: bdj-12-e115000-s001.pdf [file bdj-12-e115000-s001.pdf]

| No. | Counties (states)                                                                                                                          | Biome (IBGE, 2019)                                                                                | Latitude                                                                 | Longitude                                                             | Land use systems                                          | No. sites, plots treatments | Records | Occurrence | Soils |
|-----|--------------------------------------------------------------------------------------------------------------------------------------------|---------------------------------------------------------------------------------------------------|--------------------------------------------------------------------------|-----------------------------------------------------------------------|-----------------------------------------------------------|-----------------------------|---------|------------|-------|
| 1   | Morretes (PR)                                                                                                                              | Atlantic Forest                                                                                   | -25.47922                                                                | -48.83323                                                             | native vegetation                                         | 1                           | 36      | 1,620      | 504   |
| 2   | Teresina (PI)                                                                                                                              | Cerrado                                                                                           | -5.038931                                                                | -42.80412                                                             | agroforestry                                              | 1                           | 3       | 135        | 0     |
| 3   | Ibaiti (PR)                                                                                                                                | Atlantic Forest                                                                                   | -23.7923042                                                              | -50.653895                                                            | pasture                                                   | 1                           | 9       | 405        | 144   |
| 4   | Manaus<br>Teotônio (AM)                                                                                                                    | Amazonia                                                                                          | -3.107861111<br>-8.877638889                                             | -59.91166667<br>-64.06227778                                          | native vegetation                                         | 15                          | 60      | 2,700      | 1,260 |
| 5   | Anápolis (GO)<br>Campinas (SP)<br>Santo Antônio de Goiás (GO)<br>Londrina (PR)<br>Planaltina (PR)<br>Ponta Grossa (PR)<br>Sete Lagoas (MG) | Cerrado<br>Atlantic Forest<br>Cerrado<br>Atlantic Forest<br>Cerrado<br>Atlantic Forest<br>Cerrado | -16.32<br>-22.6<br>-16.46666<br>-23.195833<br>-15.45<br>-25.16<br>-19.45 | -48.94<br>-46.91<br>-49.28333<br>-51.18<br>-47.61<br>-50.08<br>-44.17 | annual crops                                              | 57                          | 228     | 10,260     | 0     |
| 6   | Londrina (PR)                                                                                                                              | Atlantic Forest                                                                                   | -23.331285                                                               | -51.198512                                                            | annual crops                                              | 5                           | 36      | 1,620      | 0     |
| 7   | Rio Claro (SP)                                                                                                                             | Cerrado                                                                                           | -22.50897                                                                | -47.613                                                               | perennial crops, native forest,<br>pasture                | 3                           | 18      | 810        | 126   |
| 8   | Rio Verde (GO)                                                                                                                             | Cerrado                                                                                           | -17.51748                                                                | -51.39366                                                             | native vegetation, annual crops                           | 7                           | 62      | 2,790      | 0     |
| 9   | São Jerônimo da Serra (PR)<br>Alvorada do Sul (PR)<br>Janiópolis (PR)                                                                      | Atlantic Forest                                                                                   | -23.721424<br>-22.821491<br>-24.1411                                     | -50.758206<br>-51.253196<br>-52.778851                                | perennial crops                                           | 18                          | 135     | 6,075      | 1,890 |
| 10  | Brasília (DF)                                                                                                                              | Cerrado                                                                                           | -15.952666                                                               | -47.876666                                                            | native vegetation                                         | 10                          | 40      | 1,800      | 200   |
| 11  | Manaus (AM)                                                                                                                                | Amazonia                                                                                          | -2.5166666                                                               | -60.016666                                                            | agrosilviculture, pasture, native<br>forest               | 4                           | 43      | 1,935      | 0     |
| 12  | Santa Helena de Goiás (GO)                                                                                                                 | Cerrado                                                                                           | -17.71666                                                                | -50.58333                                                             | annual crops, native vegetation                           | 5                           | 17      | 765        | 0     |
| 13  | Xanxerê (SC)<br>Chapecó (SC)                                                                                                               | Atlantic Forest                                                                                   | -26.3565<br>-27.1935                                                     | -52.481944<br>-52.65933                                               | annual crops, native vegetation                           | 10                          | 60      | 2,700      | 780   |
| 14  | Redenção (CE)                                                                                                                              | Caatinga                                                                                          | -4.248055                                                                | -38.75277                                                             | annual crops, native vegetation,<br>agroforestry, pasture | 6                           | 60      | 2,700      | 440   |

|    |                                                                                       |                 |                                                                |                                                               |                                                                                                      |    |     |       |       |
|----|---------------------------------------------------------------------------------------|-----------------|----------------------------------------------------------------|---------------------------------------------------------------|------------------------------------------------------------------------------------------------------|----|-----|-------|-------|
| 15 | Bituruna (PR)                                                                         | Atlantic Forest | -26.1578                                                       | -51.5548                                                      | annual crops, native vegetation                                                                      | 9  | 60  | 2,700 | 0     |
| 16 | Iranduba (AM)<br>Belterra (PA)<br>Porto Velho (RO)                                    | Amazonia        | -3.24640945<br>-2.78480898<br>-8.87661786                      | -60.22552<br>-54.99786<br>-64.06662                           | annual crops, native vegetation,<br>pasture                                                          | 18 | 90  | 4,050 | 810   |
| 17 | Quitandinha (PR)                                                                      | Atlantic Forest | -25.890771                                                     | -49.455284                                                    | annual crops, native vegetation,<br>horticulture                                                     | 4  | 36  | 1,620 | 540   |
| 18 | Ponta Grossa (PR)                                                                     | Atlantic Forest | -25.12497                                                      | -50.05125                                                     | annual crops, agrosilvopastoral,<br>agropastoral, native vegetation,<br>pasture, forestry plantation | 7  | 105 | 4,725 | 1,575 |
| 19 | Quixeramobim (CE)                                                                     | Caatinga        | -5.12002                                                       | -39.17591                                                     | native vegetation                                                                                    | 2  | 30  | 1,350 | 30    |
| 20 | Guarapuava (PR)                                                                       | Atlantic Forest | -25.56126                                                      | -51.48983                                                     | native vegetation, annual crops                                                                      | 6  | 18  | 810   | 198   |
| 21 | Campos Novos (SC)<br>Vacaria (RS)<br>Zortéa (SC)                                      | Atlantic Forest | -27.49302<br>-28.59276<br>-27.43772                            | -51.44327<br>-51.03484<br>-51.45405                           | annual crops, native vegetation                                                                      | 12 | 108 | 4,860 | 0     |
| 22 | Chapecó (SC)                                                                          | Atlantic Forest | -27.22037                                                      | -52.82716                                                     | annual crops, native vegetation                                                                      | 4  | 32  | 1,440 | 480   |
| 23 | Bocaina de Minas (MG)                                                                 | Atlantic Forest | -22.19817                                                      | -44.60176                                                     | agroforestry, orchard, pasture, native<br>vegetation                                                 | 12 | 72  | 3,240 | 1,008 |
| 24 | São Sebastião do Paraíso (MG)                                                         | Cerrado         | -20.92048                                                      | -46.98456                                                     | perennial crop                                                                                       | 2  | 10  | 450   | 80    |
| 25 | Bananal (SP)<br>Itaberá (SP)<br>Itapeva (SP)<br>Barra do Chapéu (SP)<br>Iporanga (SP) | Atlantic Forest | -22.80722<br>-23.83916<br>-24.071944<br>-23.84083<br>-24.47777 | -44.36638<br>-49.14444<br>-49.01861<br>-49.14444<br>-49.60388 | native vegetation, forestry plantation                                                               | 12 | 180 | 8,100 | 4,320 |
| 26 | Capão do Leão (RS)                                                                    | Pampa           | -31.80152                                                      | -52.41538                                                     | fallow, annual crops                                                                                 | 5  | 40  | 1,800 | 280   |
| 27 | Dois Vizinhos (PR)                                                                    | Atlantic Forest | -25.69397                                                      | -53.1032                                                      | native vegetation, regeneration                                                                      | 32 | 32  | 1,440 | 216   |
| 28 | Santa Maria (RS)                                                                      | Pampa           | -29.69305                                                      | -53.79204                                                     | forestry plantation, fallow, native<br>grass pasture                                                 | 5  | 25  | 1,125 | 200   |
| 29 | Santa Maria de Jetibá (ES)<br>Domingos Martins (ES)<br>Marechal Floriano (ES)         | Atlantic Forest | -20.07416<br>-20.50888<br>-20.64472                            | -40.78611<br>-41.06750<br>-44.04361                           | perennial crop                                                                                       | 12 | 108 | 4,860 | 1,512 |

|                   |                               |                 |           |           |                                                                             |     |      |        |        |
|-------------------|-------------------------------|-----------------|-----------|-----------|-----------------------------------------------------------------------------|-----|------|--------|--------|
| 30                | Nova Ipixuna (PA)             | Amazonia        | -4.80596  | -49.36581 | native forest, pasture                                                      | 18  | 90   | 4,050  | 1,800  |
| 31                | Sebastião Leal (PI)           | Cerrado         | -7.65388  | -44.04361 | annual crops, native vegetation                                             | 12  | 60   | 2,700  | 180    |
|                   | Uruçuí (PI)                   |                 | -7.23527  | -44.63583 |                                                                             |     |      |        |        |
|                   | Bom Jesus (PI)                |                 | -9.17638  | -44.84333 |                                                                             |     |      |        |        |
|                   | Baixa Grande do Ribeira (PI)  |                 | -7.80277  | -45.01666 |                                                                             |     |      |        |        |
| 32                | Campo Belo do Sul (SC)        | Atlantic Forest | -27.88203 | -50.65555 | native vegetation, forestry plantation, pasture, agropastoral, annual crops | 120 | 1080 | 48,600 | 20,520 |
|                   | Santa Teresinha do Salto (SC) |                 | -27.79965 | -50.59563 |                                                                             |     |      |        |        |
|                   | Otacílio Costa (SC)           |                 | -27.59435 | -49.84868 |                                                                             |     |      |        |        |
|                   | Xanxerê (SC)                  |                 | -26.8337  | -52.453   |                                                                             |     |      |        |        |
|                   | São Miguel do Oeste (SC)      |                 | -26.73815 | -53.53495 |                                                                             |     |      |        |        |
|                   | Chapecó (SC)                  |                 | -27.0343  | -52.6965  |                                                                             |     |      |        |        |
|                   | Joinville (SC)                |                 | -26.21996 | -48.85539 |                                                                             |     |      |        |        |
|                   | Blumenau (SC)                 |                 | -26.77835 | -49.09824 |                                                                             |     |      |        |        |
|                   | Timbó (SC)                    |                 | -26.79738 | -49.26532 |                                                                             |     |      |        |        |
|                   | Orleans (SC)                  |                 | -28.37729 | -49.26040 |                                                                             |     |      |        |        |
| Siderópolis(SC)   | -28.58239                     | -49.40531       |           |           |                                                                             |     |      |        |        |
| Lauro Muller (SC) | -28.35479                     | -49.43559       |           |           |                                                                             |     |      |        |        |
| 33                | Melgaço (PA)                  | Amazonia        | -1.73762  | -51.44566 | native vegetation                                                           | 40  | 240  | 10,800 | 2,640  |
| 34                | Nova Brasilândia d'Oeste (RO) | Amazonia        | -11.72568 | -61.77807 | orchard                                                                     | 5   | 10   | 450    | 110    |
| 35                | Itinga (MA)                   | Amazonia        | -3.91765  | -46.76388 | agroforestry, native vegetation                                             | 85  | 439  | 19,755 | 0      |
|                   | Alcântara (MA)                |                 | -2.41761  | -44.42221 |                                                                             |     |      |        |        |
|                   | São Luís (MA)                 |                 | -2.58750  | -44.21194 |                                                                             |     |      |        |        |
|                   | Tomé-Açu (PA)                 |                 | -2.64387  | -44.13823 |                                                                             |     |      |        |        |
|                   | São José de Ribamar (MA)      |                 | -2.86122  | -44.13344 |                                                                             |     |      |        |        |
|                   | Rosário (MA)                  |                 | -3.68787  | -46.75965 |                                                                             |     |      |        |        |
|                   | Centro Novo (MA)              |                 |           |           |                                                                             |     |      |        |        |
| 36                | Macapá (AP)                   | Amazonia        | 0.38      | -51.03    | annual crops                                                                | 1   | 16   | 720    | 224    |
| 37                | Macapá (AP)                   | Amazonia        | 0.96      | -50.96    | annual crops                                                                | 6   | 18   | 810    | 180    |
| 38                | Macapá (AP)                   | Amazonia        | -0.051    | -51.12    | native vegetation                                                           | 22  | 22   | 990    | 286    |
| 39                | Laranjal do Jari (AP)         | Amazonia        | -0.5641   | -52.3065  | native vegetation                                                           | 22  | 22   | 990    | 198    |

|    |                                                                                             |                 |                                                                            |                                                                            |                                                                              |    |     |       |       |
|----|---------------------------------------------------------------------------------------------|-----------------|----------------------------------------------------------------------------|----------------------------------------------------------------------------|------------------------------------------------------------------------------|----|-----|-------|-------|
| 40 | Tomé Açu (PA)                                                                               | Amazonia        | -2.40379                                                                   | -48.24761                                                                  | orchard, native vegetation, pasture                                          | 3  | 27  | 1,215 | 0     |
| 41 | Jaboti (PR)                                                                                 | Atlantic Forest | -23.70289                                                                  | -50.12447                                                                  | perennial crops                                                              | 4  | 40  | 1,800 | 320   |
| 42 | Jardim Olinda (PR)                                                                          | Atlantic Forest | -22.57002                                                                  | -52.05663                                                                  | agrosilvopastoral                                                            | 8  | 40  | 1,800 | 520   |
| 43 | São Gabriel (RS)                                                                            | Pampa           | -30.43048                                                                  | -54.36829                                                                  | native vegetation, forestry plantation                                       | 3  | 21  | 945   | 294   |
| 44 | Correntina (BA)                                                                             | Cerrado         | -13.78361                                                                  | -46.00361                                                                  | annual crops, pasture, native vegetation                                     | 6  | 30  | 1,350 | 360   |
| 45 | Planaltina (DF)                                                                             | Cerrado         | -15.58333                                                                  | -47.86666                                                                  | annual crops, pasture, native vegetation                                     | 13 | 36  | 1,620 | 252   |
| 46 | Pentecoste (CE)                                                                             | Caatinga        | -3.81880                                                                   | -39.34003                                                                  | native vegetation                                                            | 2  | 56  | 2,520 | 672   |
| 47 | Manduri (SP)<br>Brotas (SP)<br>Caiuá (SP)<br>Rancharia (SP)<br>Naviraí (MS)<br>Ipameri (GO) | Cerrado         | -22.28333<br>-23.00000<br>-23.60730<br>-22.14872<br>-22.99402<br>-17.65750 | -48.11666<br>-49.31666<br>-49.86608<br>-49.81425<br>-54.38022<br>-48.20611 | native vegetation, pasture, perennial crops, agropastoral, agrosilvopastoral | 25 | 180 | 8,100 | 1,800 |
| 48 | Brasília (DF)                                                                               | Cerrado         | -15.61222                                                                  | -47.75525                                                                  | pasture                                                                      | 12 | 36  | 1,620 | 144   |
| 49 | Nova Friburgo (RJ)                                                                          | Atlantic Forest | -22.28750                                                                  | -42.66016                                                                  | annual crops, fallow, horticulture                                           | 5  | 25  | 1,125 | 250   |
| 50 | Humaitá (AM)                                                                                | Amazonia        | -7.57901                                                                   | -63.14831                                                                  | native vegetation                                                            | 3  | 26  | 1,170 | 0     |
| 51 | São Gabriel da Cachoeira (AM)                                                               | Amazonia        | 0.21166                                                                    | -66.76333                                                                  | native vegetation                                                            | 5  | 25  | 1,125 | 350   |
| 52 | Chapecó (SC)<br>Pinhalzinho (SC)<br>São Miguel do Oeste (SC)                                | Atlantic Forest | -27.07536<br>-26.87325<br>-26.73905                                        | -52.68363<br>-52.95758<br>-53.54225                                        | native vegetation, annual crops, pasture, fallow, forestry plantation        | 27 | 174 | 7,830 | 1,740 |
| 53 | Maracajú (MS)                                                                               | Cerrado         | -21.61444                                                                  | -55.16833                                                                  | agropastoral, native vegetation                                              | 7  | 48  | 2,160 | 720   |
| 54 | Esperantina (PI)                                                                            | Cerrado         | -3.90194                                                                   | -42.23388                                                                  | agroforestry, native vegetation, annual crops                                | 10 | 50  | 2,250 | 0     |
| 55 | Manaus (AM)                                                                                 | Amazonia        | -2.80305                                                                   | -60.15555                                                                  | native vegetation                                                            | 10 | 50  | 2,250 | 630   |
| 56 | Pirapemas (MA)                                                                              | Cerrado         | -3.73083                                                                   | -45.39861                                                                  | native vegetation                                                            | 12 | 192 | 8,640 | 1,536 |
| 57 | Lauro Müller (SC)                                                                           | Atlantic Forest | -28.36616                                                                  | -49.45860                                                                  | forestry plantation, pasture, native vegetation, annual crop                 | 18 | 78  | 3,510 | 702   |
| 58 | Campinas (SP)                                                                               | Atlantic Forest | -22.90555                                                                  | -47.09277                                                                  | annual crops, fallow                                                         | 8  | 64  | 2,880 | 640   |

|           |                 |                 |           |           |                                                              |            |              |                |               |
|-----------|-----------------|-----------------|-----------|-----------|--------------------------------------------------------------|------------|--------------|----------------|---------------|
| 59        | Seropédica (RJ) | Atlantic Forest | -22.75833 | -43.68611 | orchard                                                      | 9          | 9            | 405            | 45            |
| 60        | Belém (PA)      | Amazonia        | -4.25     | -8.75     | native vegetation                                            | 4          | 40           | 1,800          | 1,120         |
| 61        | São Paulo (SP)  | Atlantic Forest | -23.65090 | -46.62252 | native vegetation                                            | 6          | 54           | 2,430          | 756           |
| 62        | Manaus (AM)     | Amazonia        | -2.98403  | -60.20130 | orchard, native vegetation                                   | 10         | 30           | 1,350          | 300           |
| 63        | Dourados (MS)   | Atlantic Forest | -22.27753 | -54.81290 | annual crops, agropastoral, pasture,<br>native vegetation    | 8          | 40           | 1,800          | 0             |
| 64        | Bom Jardim (RJ) | Atlantic Forest | -22.16722 | -42.28722 | annual crops, fallow, native forest                          | 30         | 186          | 8,375          | 2,232         |
| 65        | Valença (RJ)    | Atlantic Forest | -22.37277 | -43.78972 | pasture, native forest                                       | 6          | 79           | 3,555          | 474           |
| 66        | Paraty (RJ)     | Atlantic Forest | -23.16722 | -44.73694 | perennial crops, pasture, annual<br>crops, native vegetation | 12         | 111          | 4,995          | 0             |
| 67        | Itaboraí (RJ)   | Atlantic Forest | -22.75544 | -42.85694 | native vegetation, pasture                                   | 8          | 120          | 5,400          | 1,560         |
| Tot<br>al | <b>55</b>       |                 |           |           |                                                              | <b>834</b> | <b>1,762</b> | <b>230,445</b> | <b>55,882</b> |
